# Supplementary material
Source: publisher site journal article supplement (https://fr.pensoft.net/article/84604/download/suppl/32/)
Supplement: Supplementary file 1

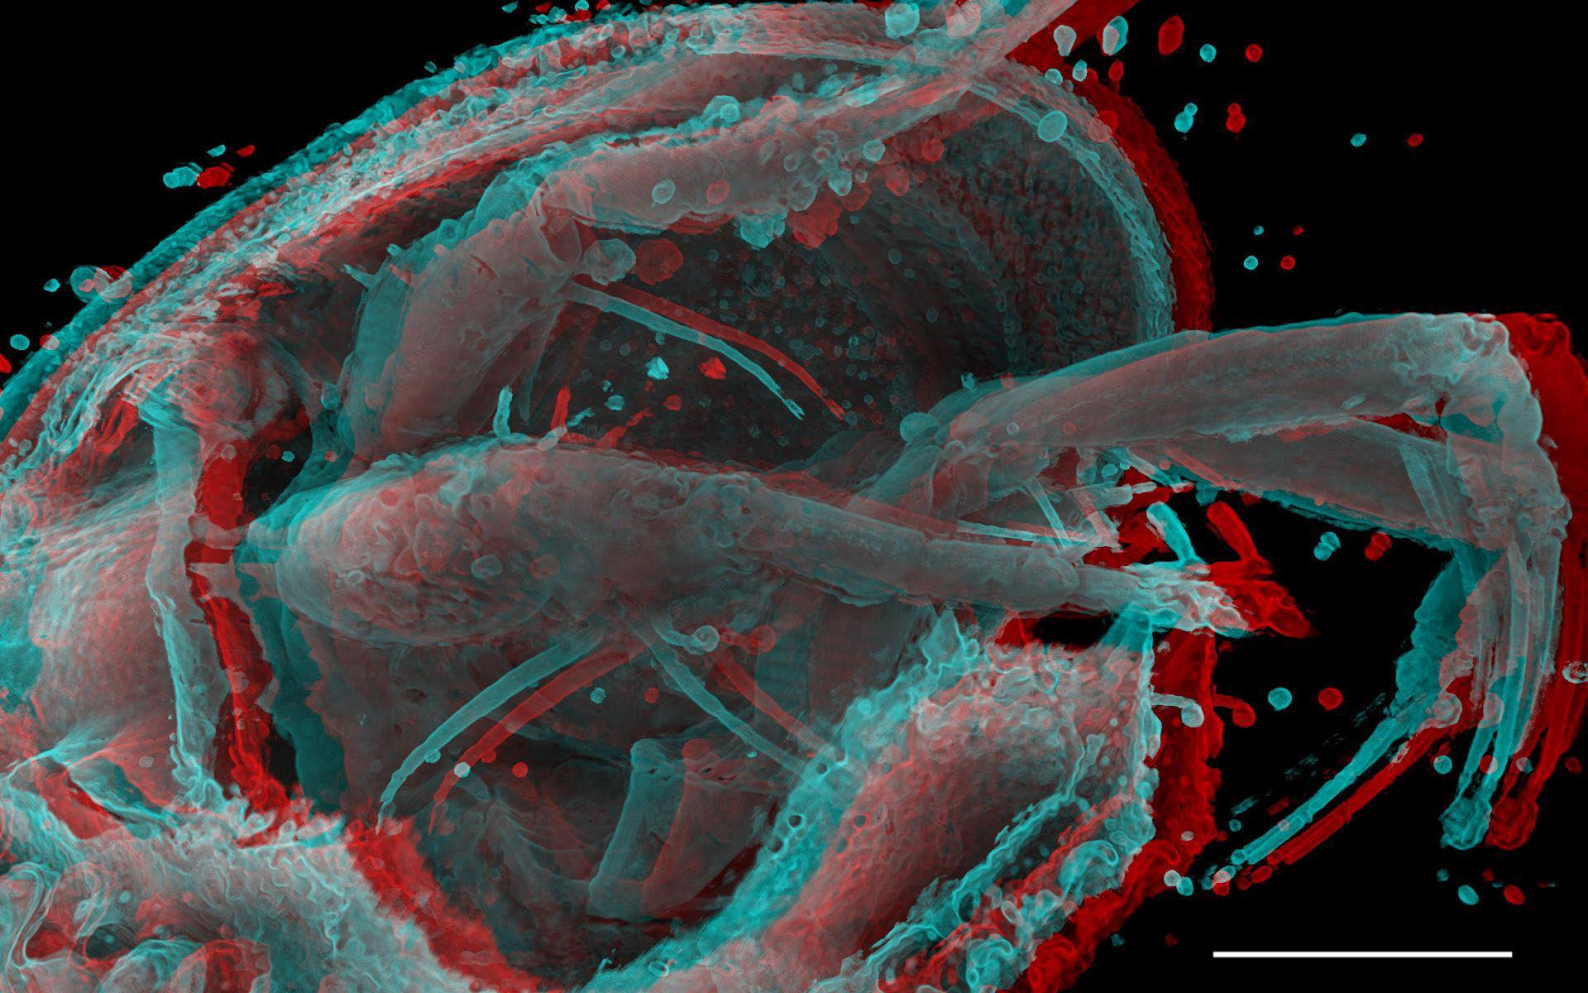

**Figure S2.** View inside the anterior part of the carapace of the adult male *Myanmarcypris hui* specimen (BA19005-1). Data visualization by volume rendering in Drishti in red-cyan. In this mode the investigation of appendages and chaetotaxy were carried out by using tools such as rotate, zoom, clip, and carve, and by modifying the two-dimensional transfer functions.
